# Supplementary material for: Susceptibility to Optical Illusions Varies as a Function of the Autism-Spectrum Quotient but not in Ways Predicted by Local–Global Biases
Source: Springer Nature journal article supplement (doi:10.1007/s10803-016-2753-1), 2016-02-25
Supplement: MOESM1 [file 7487290]

**Illusion susceptibility and quotient scores using a median-split approach**

In addition to the regression-based approach described in the paper, we also used a median-split approach to compare susceptibility scores on each of the different components between participants with low versus high scores on the AQ, EQ, and SQ. This approach turned the continuous variables of AQ, EQ, and SQ into categorical ones by first finding the median and then assigning any individual with a score below the median into the category *low* and any individual with a score above it into the category *high*. Individuals with a score equal to the median were randomly assigned to either the low or high groups. Independent samples t-tests were then applied to test for group differences. In contrast to the regression-based approach, the median-split approach did not reveal any significant findings. The median score for AQ was 16, the median score for EQ was 45, and the median score for SQ was 24. Independent samples t-tests did not show any significant differences between the low (*n* = 65) and high (*n* = 66) AQ groups for any of the components (all *p* > .279) although component D did show the strongest effect in the expected direction (*t*(129) = 1.93, *p*uncorr = .056, Cohen’s *d* = .32). Additional independent samples t-tests did not show any significant differences between the low (*n* = 61) and high (*n* = 60) EQ groups for any of the components (all *p* > .754). Likewise, independent samples t-tests did not show any significant differences between the low (*n* = 61) and high (*n* = 62) SQ groups for any of the components (all *p* > .689). We attribute the lack of effects to a reduction in power of the median-split approach in explaining variability in the data relative to the regression-based approach. This issue and other limitations of the median-split approach are discussed in much more detail elsewhere (e.g., MacCallum, Zhang, Preacher, & Rucker, 2002).

**Additional experiment on learning effects**

At the time we carried out the main experiment, we did not record the order of trial presentation, which was randomly generated by our computer program for each participant. Hence, another experiment repeated the same illusion tasks in a different set of participants so we could examine whether or not participants became better at judging the physical properties of a stimulus as a function of trial number. The control tasks were not considered in this experiment given that it was expected most participants would be fairly accurate across the four trials. Sixteen (7 males, age range 21-39, mean = 27.8) right-handed adults meeting the same inclusion and exclusion criteria as the main experiment participated. Scores for each trial were calculated by taking the absolute difference between the adjusted comparison and the fixed standard. To ascertain whether or not participants could learn to more accurately judge the physical properties of the standard within the four trials allocated per illusion task, we entered scores for each trial in an ANOVA with Task and Trial Number (1 vs. 2 vs. 3 vs. 4) as within-subject factors. This analysis did not reveal any evidence of increased performance as a function of trial number. There was no main effect of Trial Number (*F(3,45)* = 1.48, *p* = .234, *η2* = .090) nor did this factor interact with Task (*F(12,180)* = 1.31, *p* = .111, *η2* = .080). Nonetheless, there was a main effect of Task (*F(12,180)* = 18.36, *p* < .001, *η2* = .550) driven by the differences in strength across the different illusions.

**References**

MacCallum, R. C., Zhang, S., Preacher, K. J., & Rucker, D. D. (2002). On the practice of dichotomization of quantitative variables. *Psychol Methods, 7*(1), 19-40.
